# Supplementary material for: Isolation and Structure Characterization of an Antioxidative Glycopeptide from Mycelial Culture Broth of a Medicinal Fungus
Source: PubMed Central journal article supplement (PMC4227164; doi:10.3390/ijms151017318), 2014-09-29
Supplement: ijms-15-17318-s001.pdf [file ijms-15-17318-s001.pdf]

# Supplementary Information

Figure 1. MALDI-TOF-MS spectra of Cs-GP1.

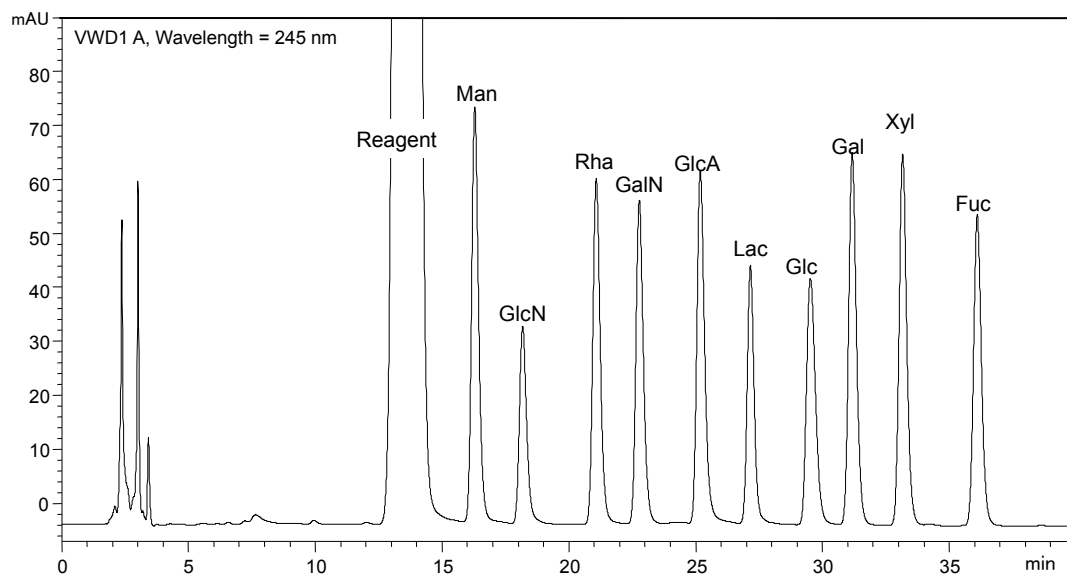

**Figure 2.** Monosaccharide composition of Cs-GP1 by HPLC: (a) monosaccharide standards; (b) glycoprotein Cs-GP1.

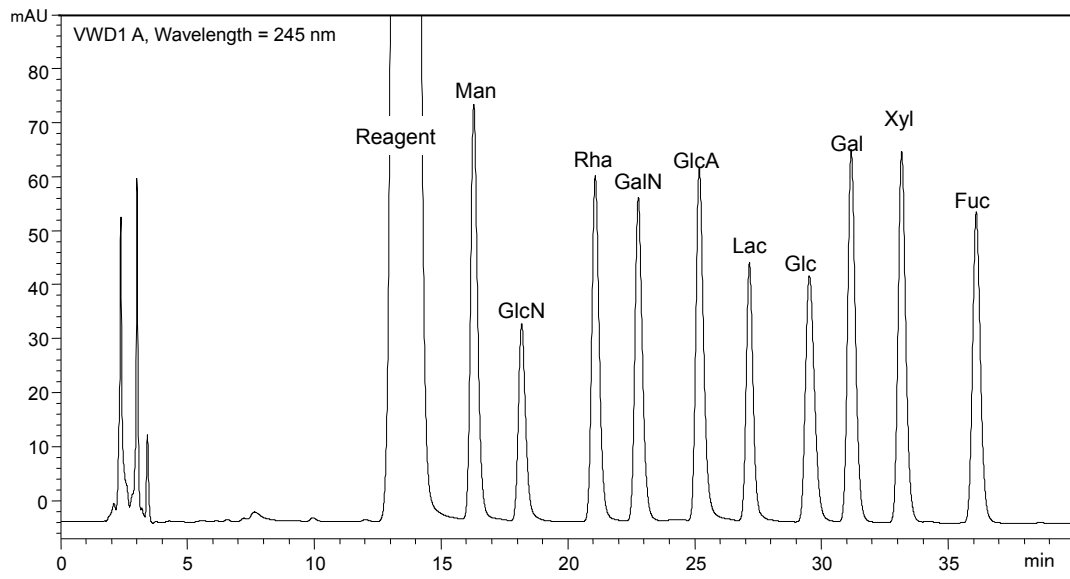

(a)

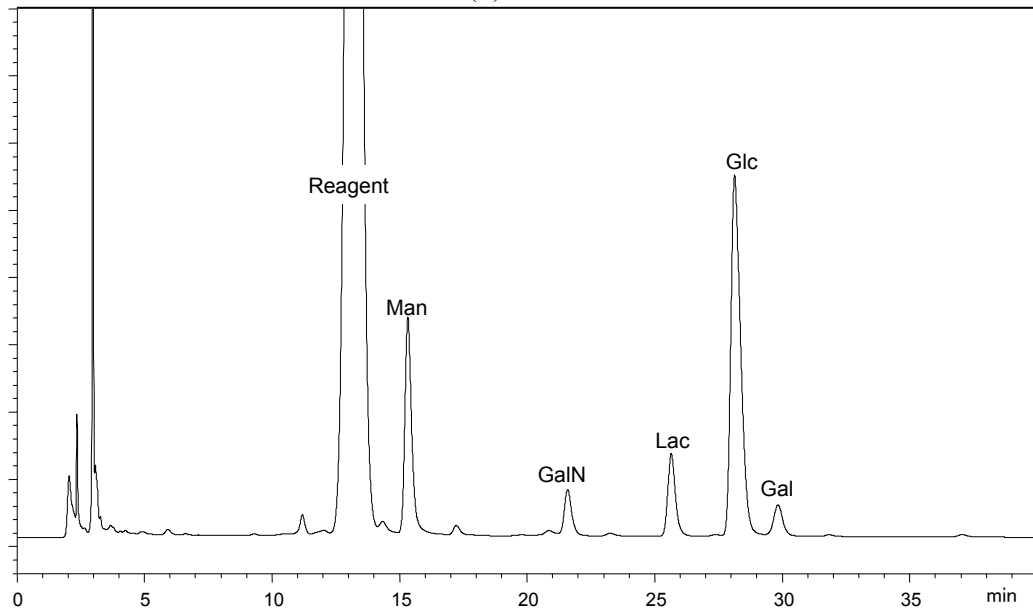

(b)
